# Supplementary material
Source: MDPI journal article supplement (https://www.mdpi.com/2073-4352/13/12/1685)
Supplement: s1 [file s1]

## Supplementary Information

### Relevant parameters for the mechanochemical synthesis of bimetallic supported catalysts

Maila Danielis <sup>1</sup>, Andrea Braga <sup>1,2</sup>, Núria J. Divins <sup>2</sup>, Jordi Llorca <sup>2</sup>, Alessandro Trovarelli <sup>1</sup>, and Sara Colussi <sup>1,\*</sup>

<sup>1</sup> Università degli Studi di Udine, Dipartimento Politecnico, e INSTM, Via del Cotonificio 108, 33100 Udine, Italy

<sup>2</sup> Institute of Energy Technologies, Department of Chemical Engineering and Barcelona Research Center in Multiscale Science and Engineering, Universitat Politècnica de Catalunya, EEBE, Eduard Maristany 10-14, 08019 Barcelona, Spain

\* Correspondence: sara.colussi@uniud.it

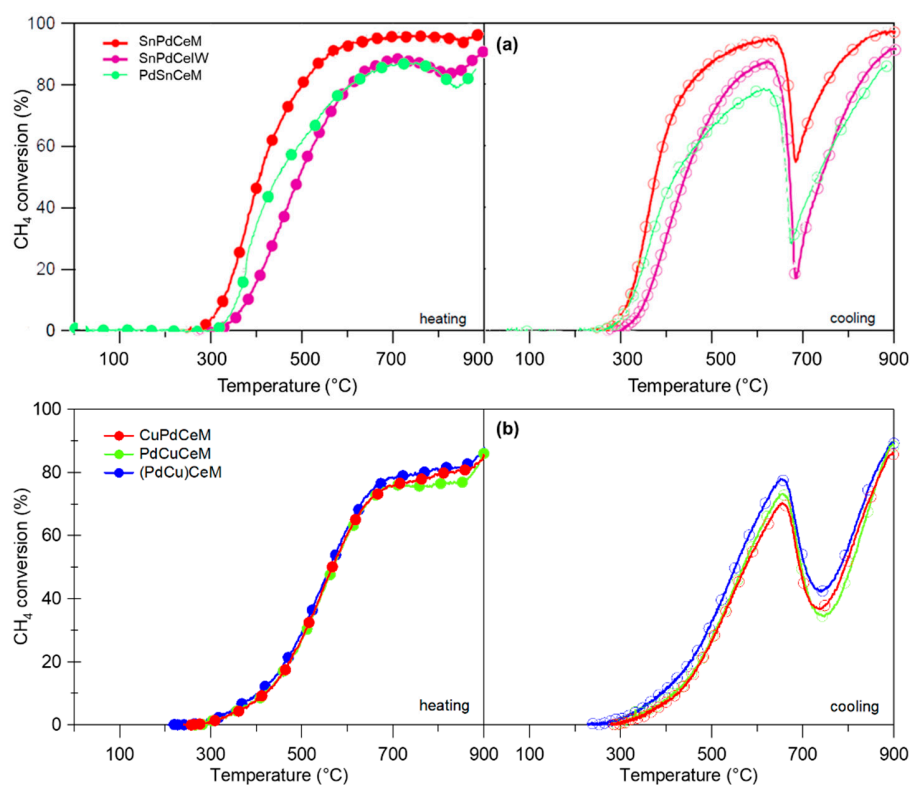

**Figure S1.** Methane oxidation activity of (a) PdSn/CeO<sub>2</sub> and (b) PdCu/CeO<sub>2</sub> catalysts. Gas feed: 0.5%CH<sub>4</sub>, 2%O<sub>2</sub> in He, GHSV = 180'000 h<sup>-1</sup>, heating and cooling ramps 10 °C min<sup>-1</sup>. M: Milled samples, IW: prepared by Incipient Wetness Impregnation.

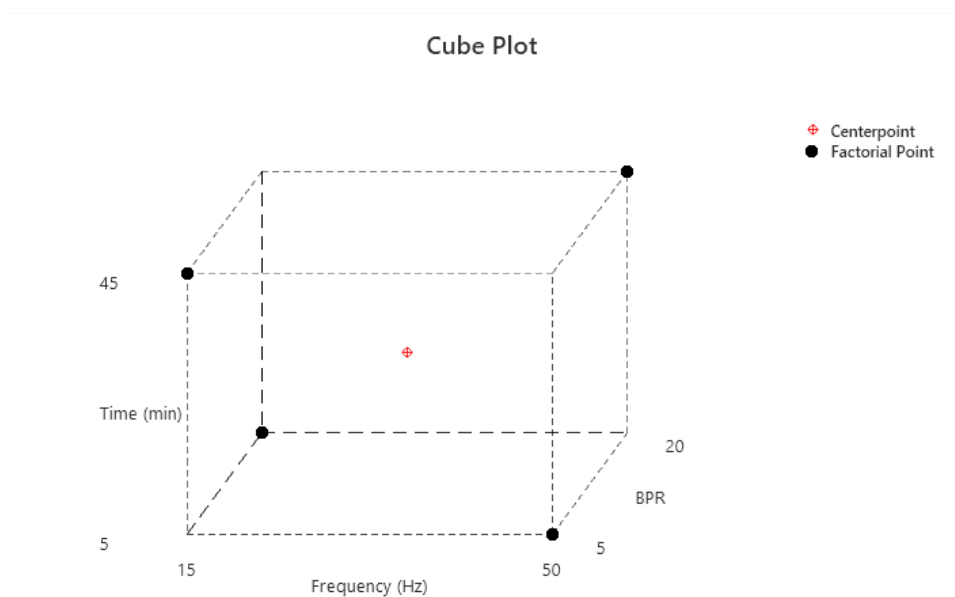

**Figure S2.** Graphical representation of the 3D space generated by the three variables, including the central point (in red). For comparison, the OVAT method would start from one point and then move first in one direction, following one axis, and then in the other directions starting from the optimum of each axis, progressively. This approach usually requires a higher and unplanned number of experiments [1], without necessarily reaching the optimum and hindering extrapolation of the effect of each parameter on the final result.

**Table S1.** Methane conversion at 700 °C (steam-to-carbon = 2, F/W = 202 500 mL/g<sub>cat</sub> h), NiO crystallite size inferred by XRD measurements, and normalized Raman intensity of the signal at 570 cm<sup>-1</sup> (typical of Ni-O-Ce bonds and oxygen vacancies [2]) for the samples prepared with the Fractional Factorial design.

| <b>Sample</b> | <b>X<sub>CH<sub>4</sub></sub> at 700 °C</b> | <b>NiO size<br/>(nm)</b> | <b>Raman<br/>intensity (a.u.)</b> |
|---------------|---------------------------------------------|--------------------------|-----------------------------------|
| 1-PtNiCe(--+) | 21.8%                                       | 19.8                     | 2.0                               |
| 2-PtNiCe(++-) | 44.8%                                       | 22.9                     | 2.5                               |
| 3-PtNiCe(+--) | 60.2%                                       | 14.6                     | 4.4                               |
| 4-PtNiCe(000) | 59.9%                                       | 13.6                     | 7.3                               |
| 5-PtNiCe(+++) | 83.5%                                       | 12.0                     | 7.1                               |

## References

1. Leardi, R. Experimental Design in Chemistry: A Tutorial. *Analytica Chimica Acta* **2009**, *652*, 161–172, doi:10.1016/j.aca.2009.06.015.
2. Liu, Y.-M.; Wang, L.-C.; Chen, M.; Xu, J.; Cao, Y.; He, H.-Y.; Fan, K.-N. Highly Selective Ce–Ni–O Catalysts for Efficient Low Temperature Oxidative Dehydrogenation of Propane. *Catal Lett* **2009**, *130*, 350–354, doi:10.1007/s10562-009-9977-z.
